# Supplementary material for: The association between continuous ambulatory heart rate, heart rate variability, and 24-h rhythms of heart rate with familial longevity and aging
Source: publisher site journal article supplement (doi:10.18632/aging.204219), 2022-08-16
Supplement: Supplementary file [file aging-v14i18-204219-supplementary-material-SD1.pdf]

## SUPPLEMENTARY TABLES

**Supplementary Table 1. Sensitivity analysis of mean heart rate over 24 h and during sleep and awake periods in groups that differ in familial longevity status or chronological age excluding participants using medication possibly influencing HR or HRV.**

|                                 | Offspring of long-lived families (N = 35) | Partners of the offspring (N = 25) | Middle-aged* (N = 60) | Young (N = 35) | P value <sup>+</sup> | P value <sup>++</sup> |
|---------------------------------|-------------------------------------------|------------------------------------|-----------------------|----------------|----------------------|-----------------------|
| Heart rate - 24 h [bpm]         | 71.91 (8.95)                              | 72.63 (6.74)                       | 72.34 (8.06)          | 75.36 (8.80)   | 0.734                | 0.087                 |
| Heart rate - sleep period [bpm] | 62.73 (7.30)                              | 63.10 (6.64)                       | 62.98 (6.99)          | 60.87 (6.26)   | 0.843                | 0.139                 |
| Heart rate - awake period [bpm] | 77.73 (10.27)                             | 78.17 (7.21)                       | 78.00 (9.07)          | 83.37 (10.29)  | 0.853                | 0.009                 |

Data presented as estimated mean (standard deviation). The linear regression analyses between offspring of long-lived families and their partners as controls were adjusted for sex and calendar age. The linear regression model analyses between the middle-aged group and young were adjusted for sex. \*Data of offspring and partners combined. <sup>+</sup>P-value for difference between offspring of long-lived parents and their partners as controls. <sup>++</sup>P-value for difference between middle-aged group and young.

**Supplementary Table 2. Sensitivity analysis of detrended fluctuation analysis (DFA) as a measure of heart rate variability (HRV) in groups that differ in familial longevity status or chronological age excluding participants using medication possibly influencing HR or HRV.**

|                     | Offspring of long-lived families (N = 35) | Partners of the offspring (N = 25) | Middle-aged* (N = 60) | Young (N = 35) | P value <sup>+</sup> | P value <sup>++</sup> |
|---------------------|-------------------------------------------|------------------------------------|-----------------------|----------------|----------------------|-----------------------|
| <b>Sleep period</b> |                                           |                                    |                       |                |                      |                       |
| alpha-1 (4–45)      | 1.09 (0.19)                               | 1.05 (0.24)                        | 1.07 (0.21)           | 1.08 (0.12)    | 0.476                | 0.811                 |
| alpha-2 (64–1000)   | 0.94 (0.12)                               | 1.01 (0.15)                        | 0.97 (0.14)           | 0.85 (0.11)    | 0.055                | <0.001                |
| <b>Awake period</b> |                                           |                                    |                       |                |                      |                       |
| alpha-1 (4–45)      | 0.99 (0.15)                               | 0.98 (0.19)                        | 0.99 (0.17)           | 1.00 (0.13)    | 0.897                | 0.770                 |
| alpha-2 (64–1000)   | 1.09 (0.11)                               | 1.12 (0.10)                        | 1.11 (0.10)           | 1.04 (0.10)    | 0.343                | 0.003                 |

Data presented as mean (standard deviation). The linear mixed model analyses between offspring of long-lived parents and their partners as controls were adjusted for sex and calendar age. The linear mixed model analyses between the middle-aged and young groups were adjusted for sex. Alpha-1 represents brief fluctuations and alpha-2 long-term fluctuations. \*Data of offspring and partners combined. <sup>+</sup>P-value for difference between offspring of long-lived parents and their partners as controls. <sup>++</sup>P-value for difference between middle-aged group and young.

**Supplementary Table 3. Sensitivity analysis of measures of 24-h rhythms in heart rate in groups that differ in familial longevity status or chronological age excluding participants using medication possibly influencing HR or HRV.**

|                                                | <b>Offspring of long-lived families (N = 35)</b> | <b>Partners of the offspring (N = 25)</b> | <b>Middle-aged* (N = 60)</b> | <b>Young (N = 35)</b> | <b>P value<sup>+</sup></b> | <b>P value<sup>++</sup></b> |
|------------------------------------------------|--------------------------------------------------|-------------------------------------------|------------------------------|-----------------------|----------------------------|-----------------------------|
| Mesor [bpm]                                    | 71.65 (7.49)                                     | 72.88 (7.04)                              | 72.21 (7.30)                 | 75.47 (7.51)          | 0.514                      | 0.039                       |
| Absolute amplitude [bpm] <sup>×</sup>          | 11.44 (5.62)                                     | 11.90 (3.74)                              | 11.44 (5.05)                 | 14.82 (5.58)          | 0.605                      | 0.001                       |
| Relative amplitude percentage [%] <sup>×</sup> | 15.07 (6.72)                                     | 16.10 (5.18)                              | 15.56 (6.17)                 | 19.43 (5.73)          | 0.524                      | <0.001                      |
| Trough time [hh:mm] <sup>°</sup>               | 03:54 (00:30)                                    | 03:42 (00:18)                             | 03:54 (00:24)                | 04:30 (00:30)         | 0.491                      | 0.030                       |
| Minimum heart rate [bpm]                       | 59.59 (7.60)                                     | 60.29 (6.86)                              | 59.82 (7.26)                 | 58.64 (6.86)          | 0.711                      | 0.439                       |
| Peak time [hh:mm] <sup>°</sup>                 | 13:54 (00:48)                                    | 15:12 (00:54)                             | 14:24 (00:48)                | 17:54 (01:00)         | 0.289                      | 0.007                       |
| Maximum heart rate [bpm]                       | 82.61 (9.56)                                     | 83.76 (9.42)                              | 83.22 (9.45)                 | 89.44 (10.04)         | 0.648                      | 0.004                       |

Data presented as mean (standard deviation) unless otherwise stated. The linear mixed model analyses between offspring of long-lived parents and their partners as controls were adjusted for sex and calendar age. The linear mixed model analyses between the middle-aged and young groups were adjusted for sex. <sup>×</sup>For these measures, data are presented as median (interquartile range) and non-parametric tests without correction for confounders were performed (Mann-Whitney U) due to no normal distribution. <sup>°</sup>For these measures, data is shown as circular mean (standard deviation) and non-parametric circular tests without adjustment for confounders (Watson-Wheeler test) were performed. \*Data of offspring and partners combined. <sup>+</sup>P-value for difference between offspring of long-lived parents and their partners as controls. <sup>++</sup>P-value for difference between middle-aged group and young.
